# Supplementary material
Source: Royal Society of Chemistry journal article supplement (doi:10.1039/d6tb00491a)
Supplement: d6tb00491a1.pdf [file d6tb00491a1.pdf]

## Supplementary Materials

### Supplementary Material S1: Sample Size Calculation for Animal Study

#### 1. Objective

To determine the minimum number of animals per group required to detect statistically significant differences in caries lesion depth ( $\mu\text{m}$ ) among three groups (Control, 3M-FRC, 10QM-Resin) in a rat secondary caries model.

#### 2. Pilot Data

Pilot experiment was performed with 2 animals per group. The observed mean (M) and standard deviation (SD) for each group are shown in Table S1.

**Table S1.** Pilot data summary (caries lesion depth,  $\mu\text{m}$ )

| Group      | Animal 1 | Animal 2 | Mean (M) | SD (s) |
|------------|----------|----------|----------|--------|
| Control    | 171.03   | 214.7    | 192.9    | 30.9   |
| 3M-FRC     | 126.86   | 171.13   | 149.0    | 31.3   |
| 10QM-Resin | 81.96    | 51.48    | 66.7     | 21.6   |

#### 3. Assumptions for Sample Size Calculation

- One-way ANOVA (three groups)
- Significance level  $\alpha = 0.05$  (two-tailed)
- Desired power  $1 - \beta = 0.95$
- Equal sample size per group
- Common within-group variance  $\sigma^2$  estimated from pilot data

#### 4. Pooled Variance Estimation

$$\begin{aligned}\sigma^2 &= \frac{(n_1 - 1)s_1^2 + (n_2 - 1)s_2^2 + (n_3 - 1)s_3^2}{(n_1 + n_2 + n_3) - k} \\ &= \frac{(2 - 1) \times 30.9^2 + (2 - 1) \times 31.3^2 + (2 - 1) \times 21.6^2}{(2 + 2 + 2) - 3} \\ &= \frac{954.81 + 979.69 + 466.56}{3} = \frac{2401.06}{3} \approx 800.35 (\sigma \approx 28.3)\end{aligned}$$

#### 5. Sample Size Calculation Using PASS 15.0

We used **PASS 15.0** (Power Analysis and Sample Size, NCSS, LLC, Kaysville, UT, USA) with the **One-Way ANOVA** procedure. The following parameters were entered:

- Number of groups: 3

- Alpha ( $\alpha$ ): 0.05
- Power: 0.95
- Group means: 192.9, 149.0, 66.7
- Common standard deviation: 28.3 (from pooled estimate)

The calculated result was **4 animals per group** (total 12 animals). The PASS output (screenshot not shown) confirms that a sample size of 4 per group achieves a power > 0.95.

## 6. Manual Verification Using Non-centrality Parameter Approach

For one-way ANOVA, the non-centrality parameter  $\lambda$  is:

$$\lambda = n \cdot \frac{\sum_{i=1}^k (\mu_i - \bar{\mu})^2}{\sigma^2}$$

where  $\bar{\mu} = (192.9 + 149.0 + 66.7)/3 = 136.2$ .

$$\sum (\mu_i - \bar{\mu})^2 = (192.9 - 136.2)^2 + (149.0 - 136.2)^2 + (66.7 - 136.2)^2 \approx 8209.0$$

Thus,

$$\frac{\sum (\mu_i - \bar{\mu})^2}{\sigma^2} \approx \frac{8209.0}{800.35} \approx 10.26$$

Solving iteratively for n:

- $n = 3$  gives  $\lambda \approx 30.78$ , power  $\approx 0.93$  (below target)
- $n = 4$  gives  $\lambda \approx 41.04$ , power  $> 0.99$  (exceeds target)

Therefore, the minimum required sample size is **n = 4 per group**, consistent with the PASS result.

## 7. Final Sample Size

Because the pilot data came from only 2 animals per group (which may underestimate true population variance) and to account for potential animal dropout, we conservatively increased the sample size to **6 animals per group**. This final sample size (n=6 per group, total 18 rats) also aligns with previous rat secondary caries model studies [1].

## References

[1] Chen H, Xu M, Zhang B, Yu S, Weir MD, Melo MAS, Masri RM, Tang Y, Xu HHK, Yang D. Novel strategy of *S. mutans* gcrR gene over-expression plus antibacterial dimethylaminohexadecyl methacrylate suppresses biofilm acids and reduces dental caries in rats. Dent Mater. 2024 Oct;40(10):e41-e51.
